# Supplementary material for: Delineating the Dynamic Transcriptome Response of mRNA and microRNA during Zebrafish Heart Regeneration
Source: MDPI journal article supplement (doi:10.3390/biom9010011), 2018-12-28

Total counts per sample per million

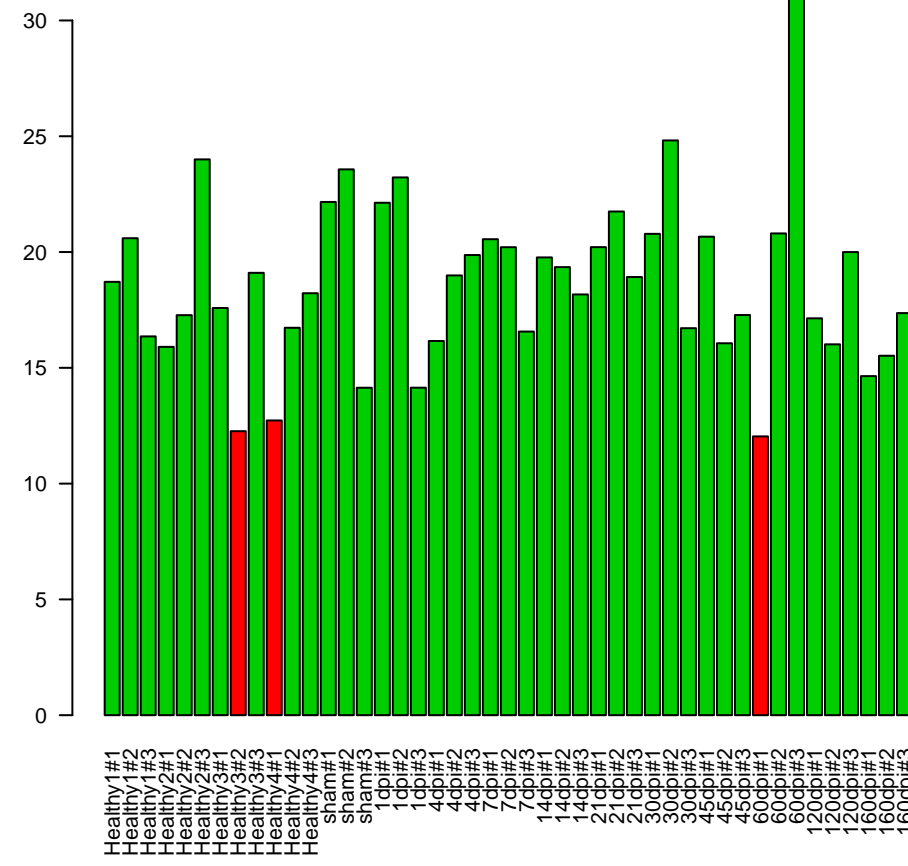

Boxplot distribution

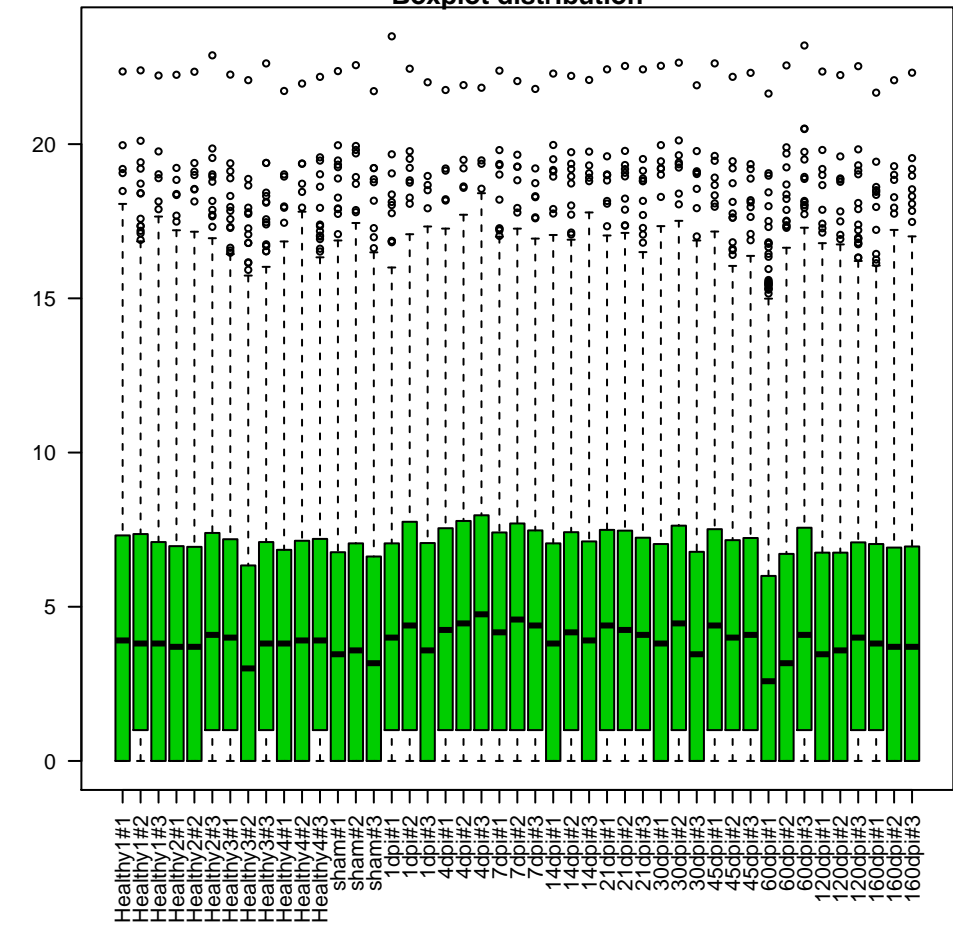

Dendrogram

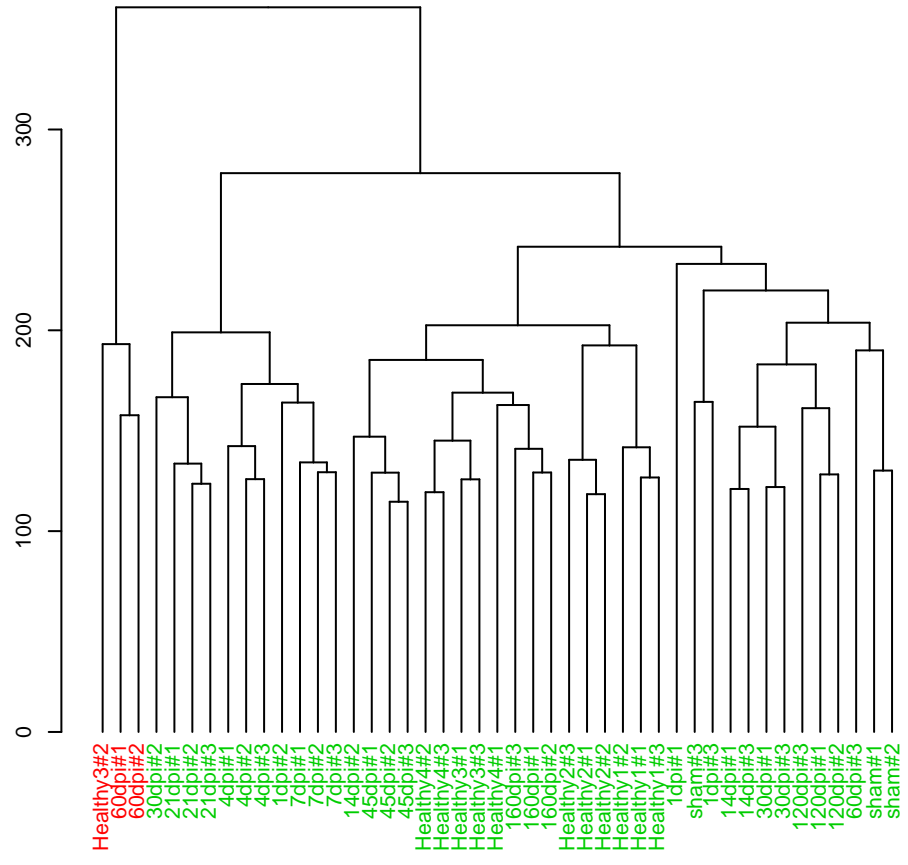

PCA

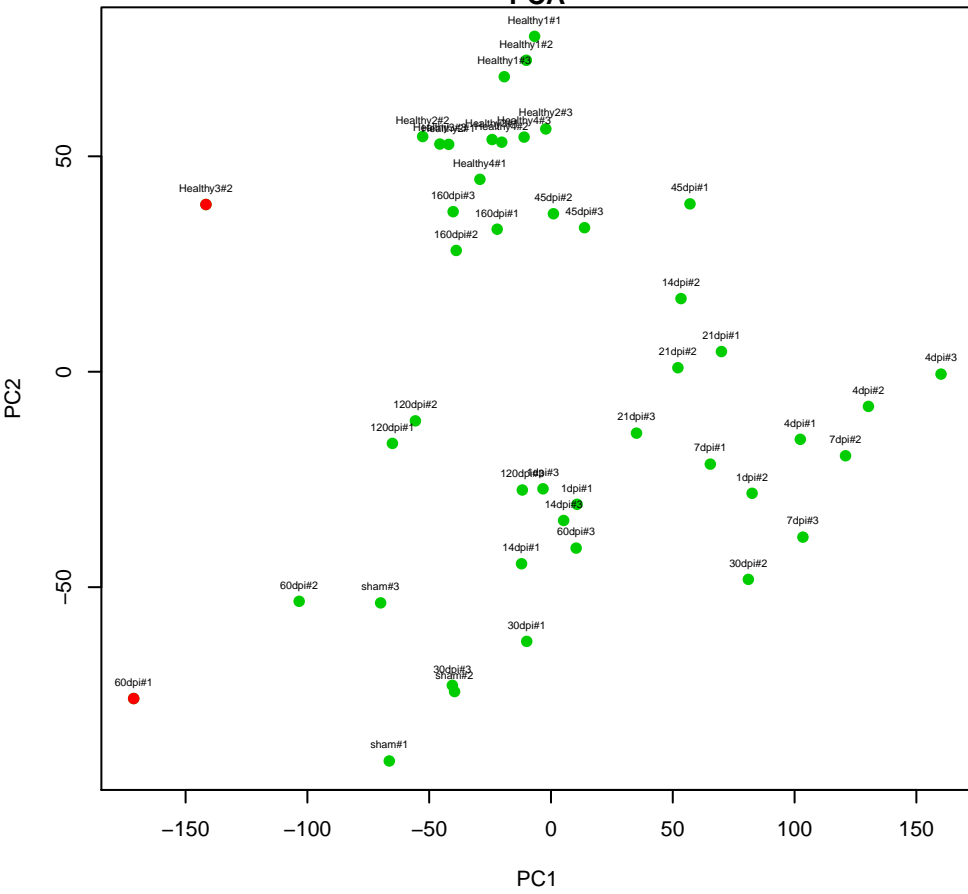

Proportion of null counts per sample

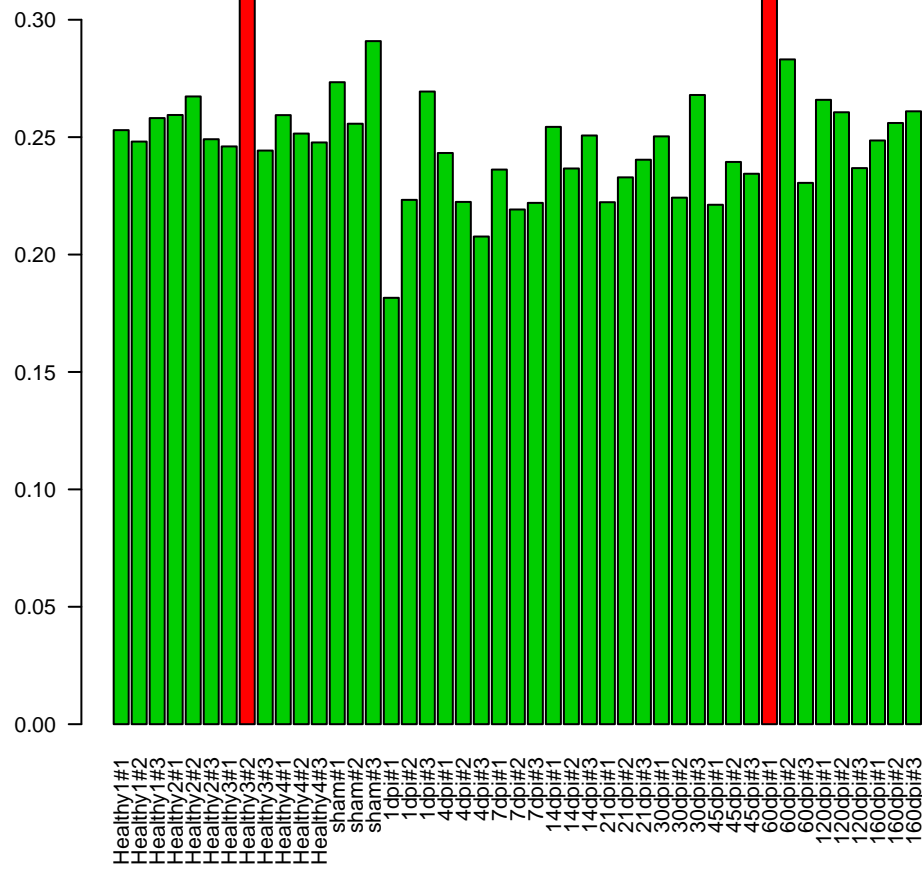

Proportion of most expressed sequence per sample

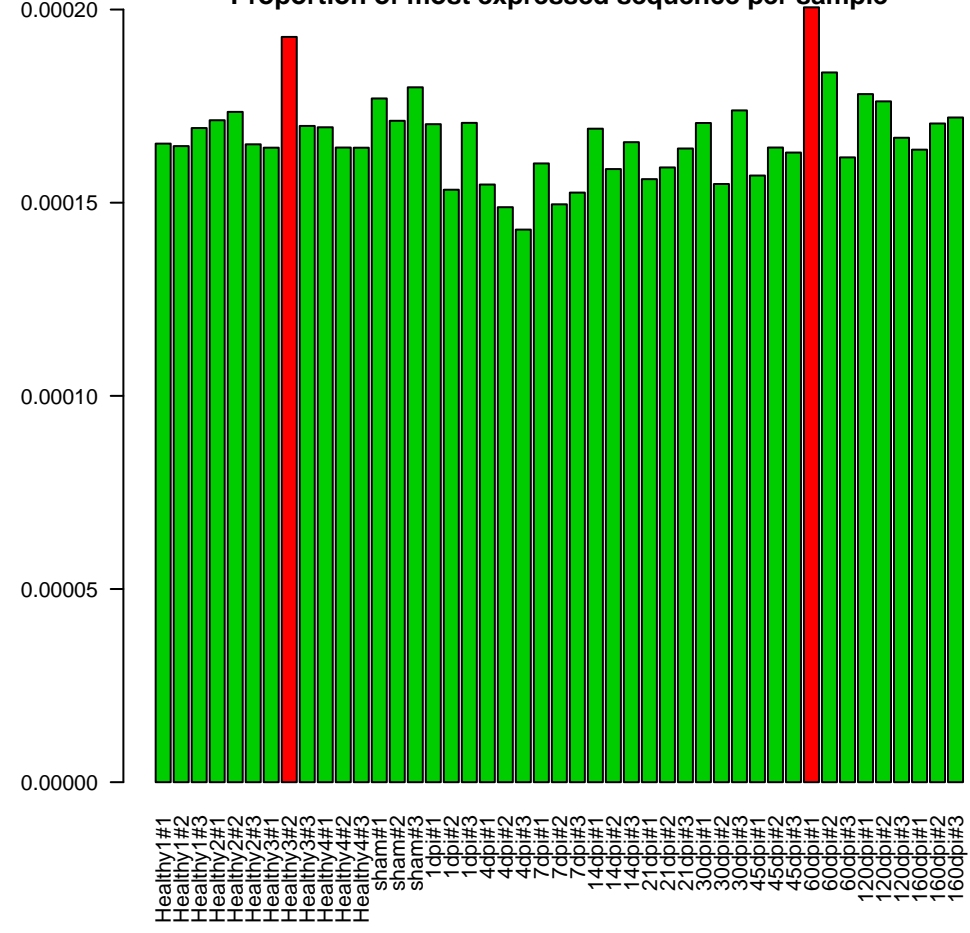

Supplement: s1 [file s1]
