# Supplementary figures and images for: Delineating the Dynamic Transcriptome Response of mRNA and microRNA during Zebrafish Heart Regeneration
Source: MDPI journal article supplement (doi:10.3390/biom9010011), 2018-12-28

Data before batch correction

mRNA

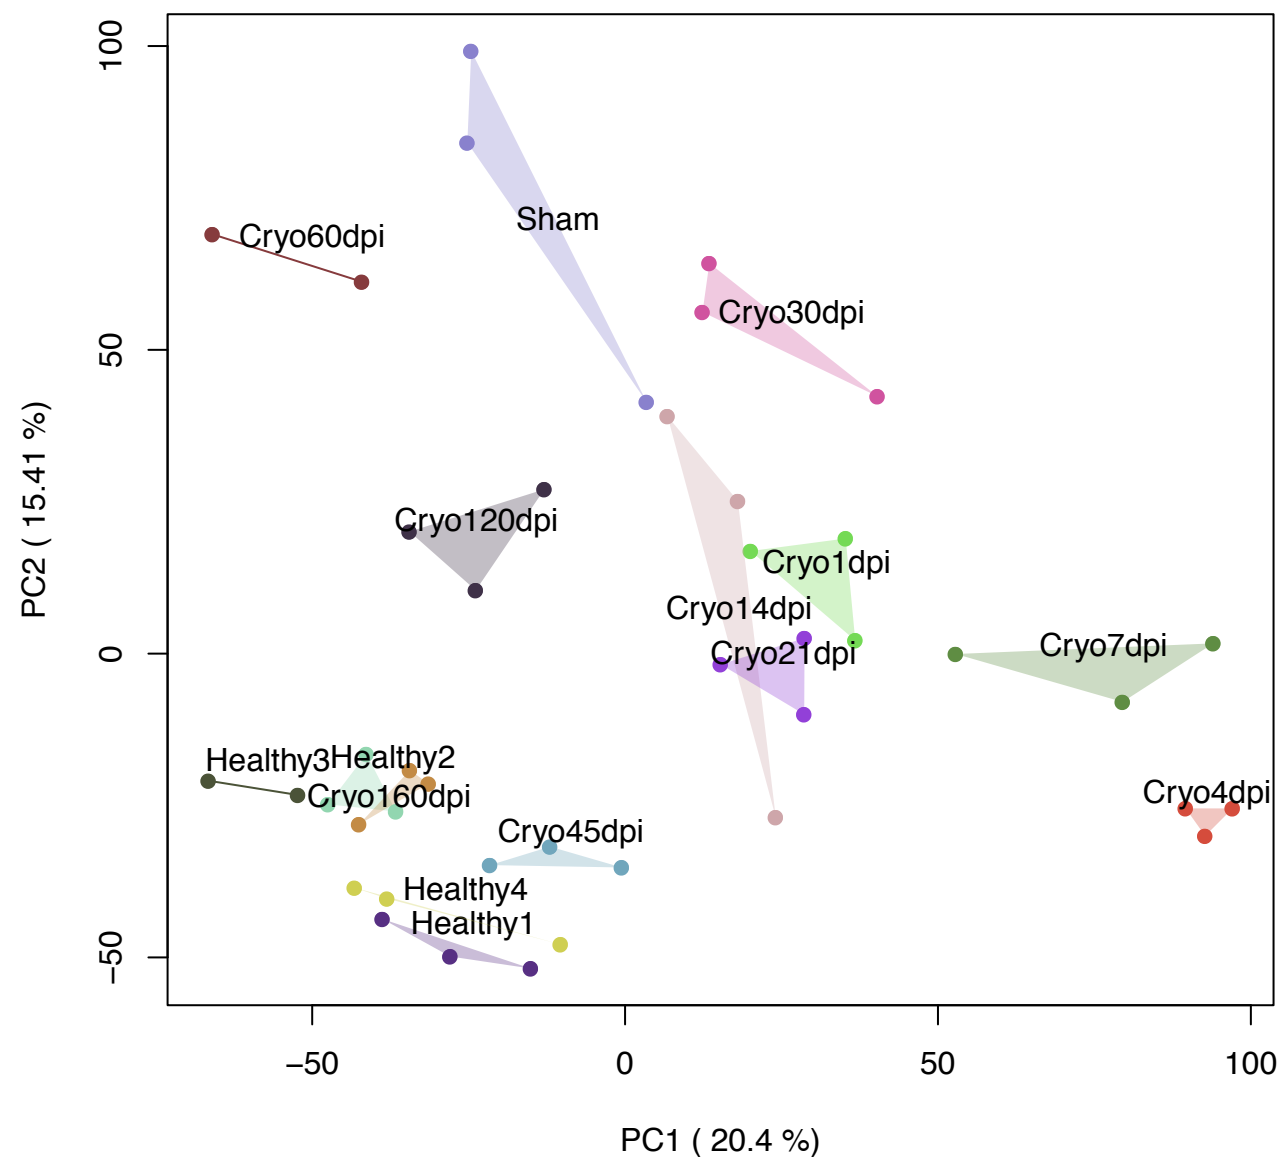

SVA

Data after batch correction

PC2 ( 15.5 %)

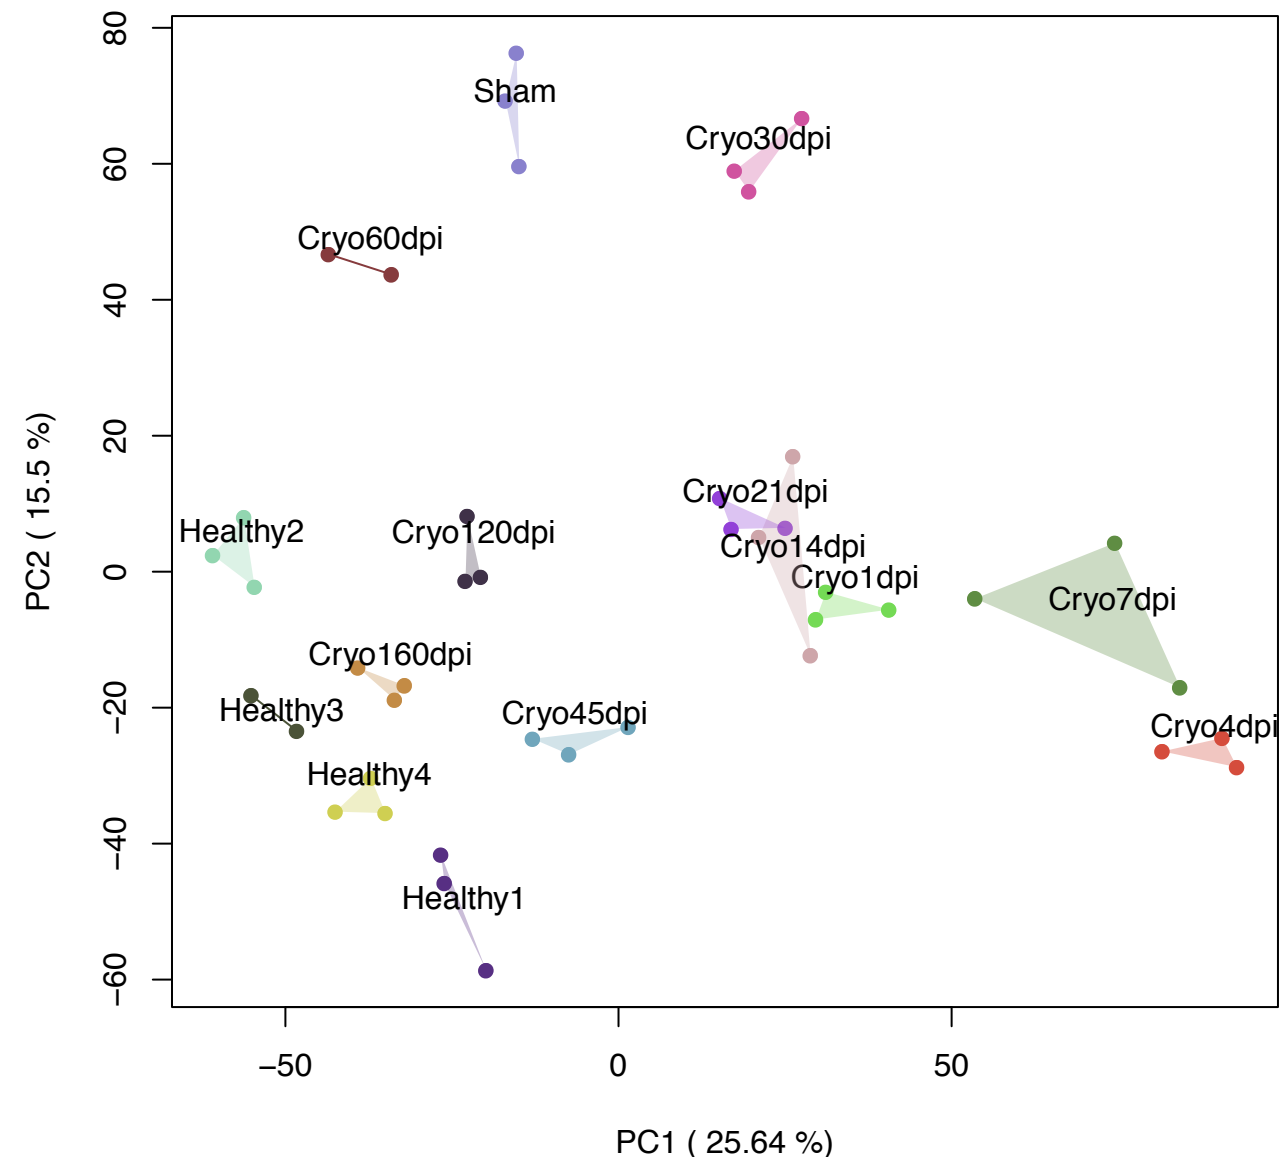

miRNA

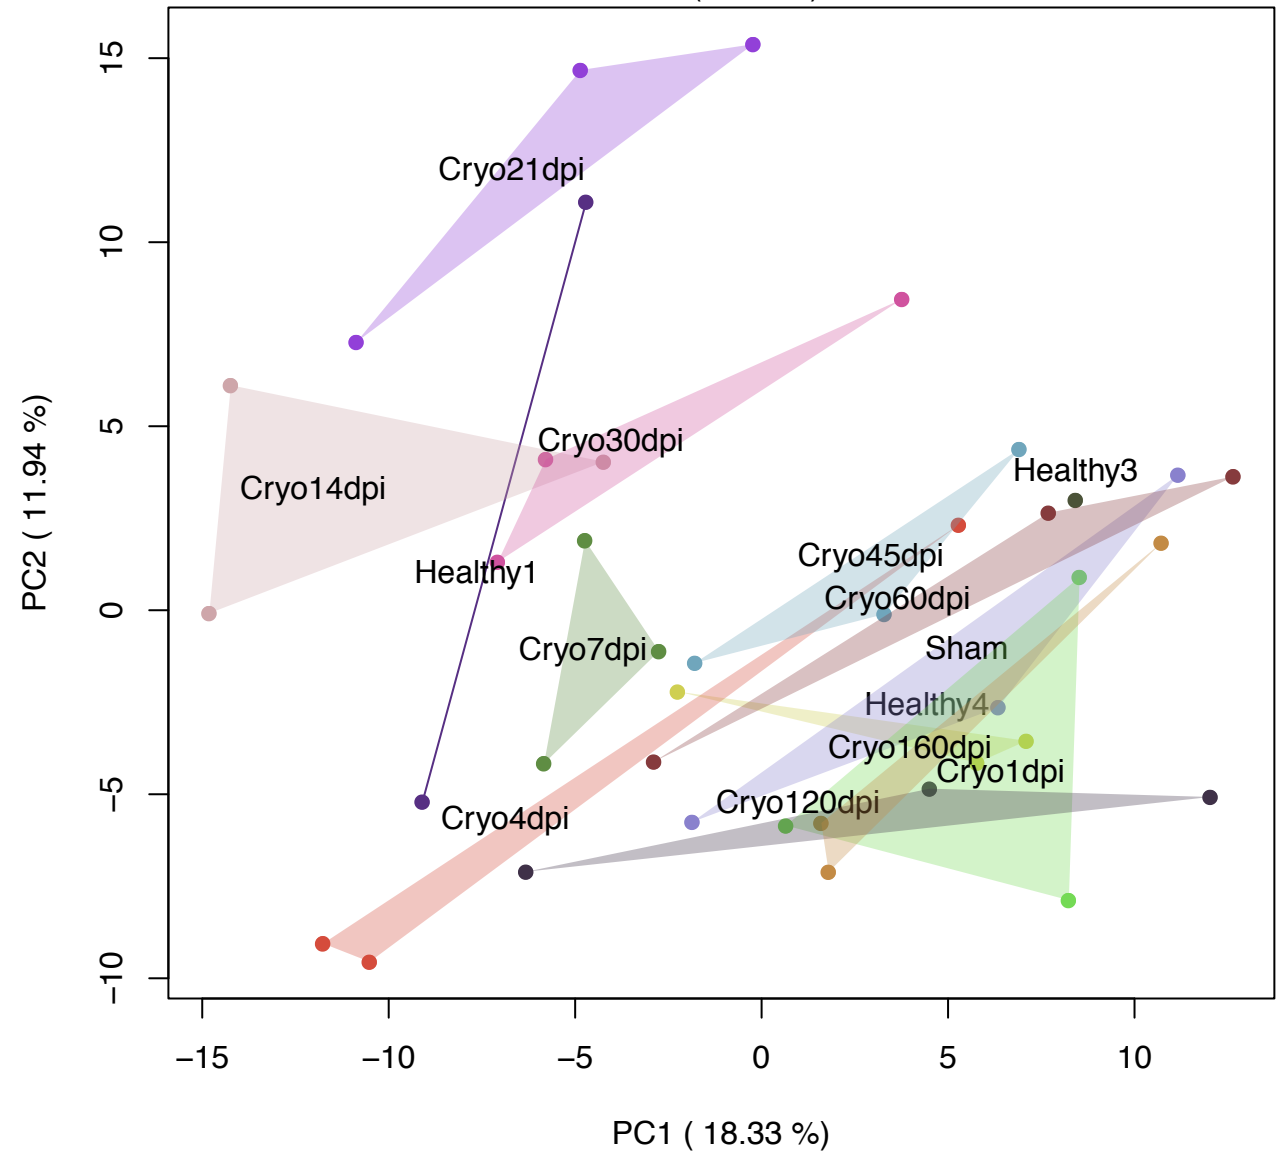

SVA

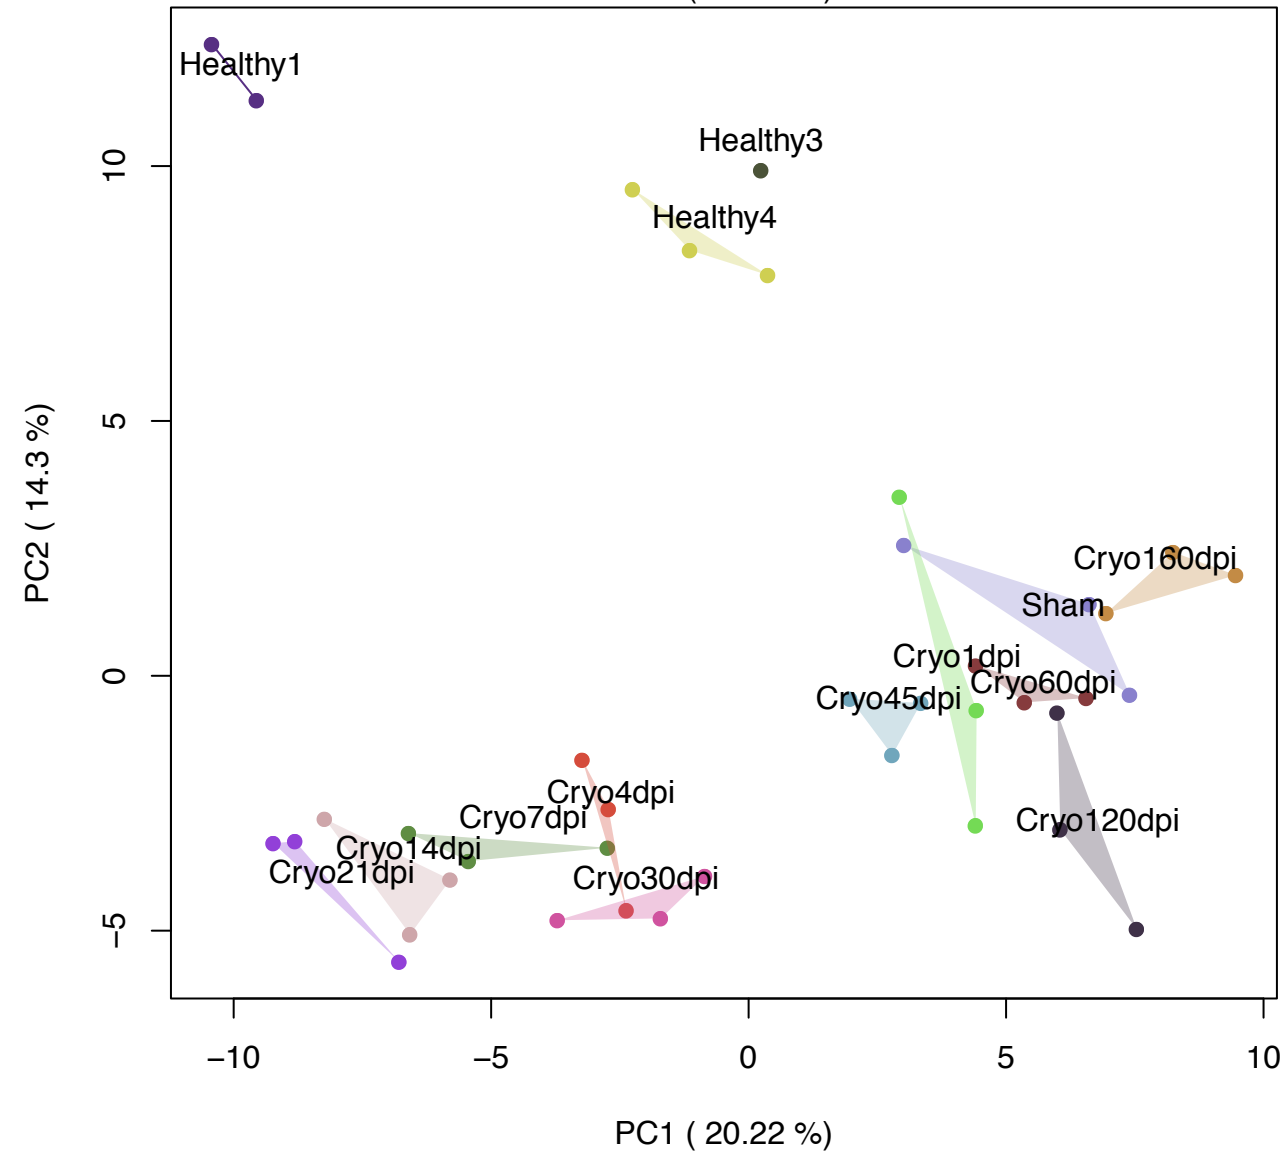

Supplement: s1 [file s1]

## miRNA read counts in H9c2 cell line

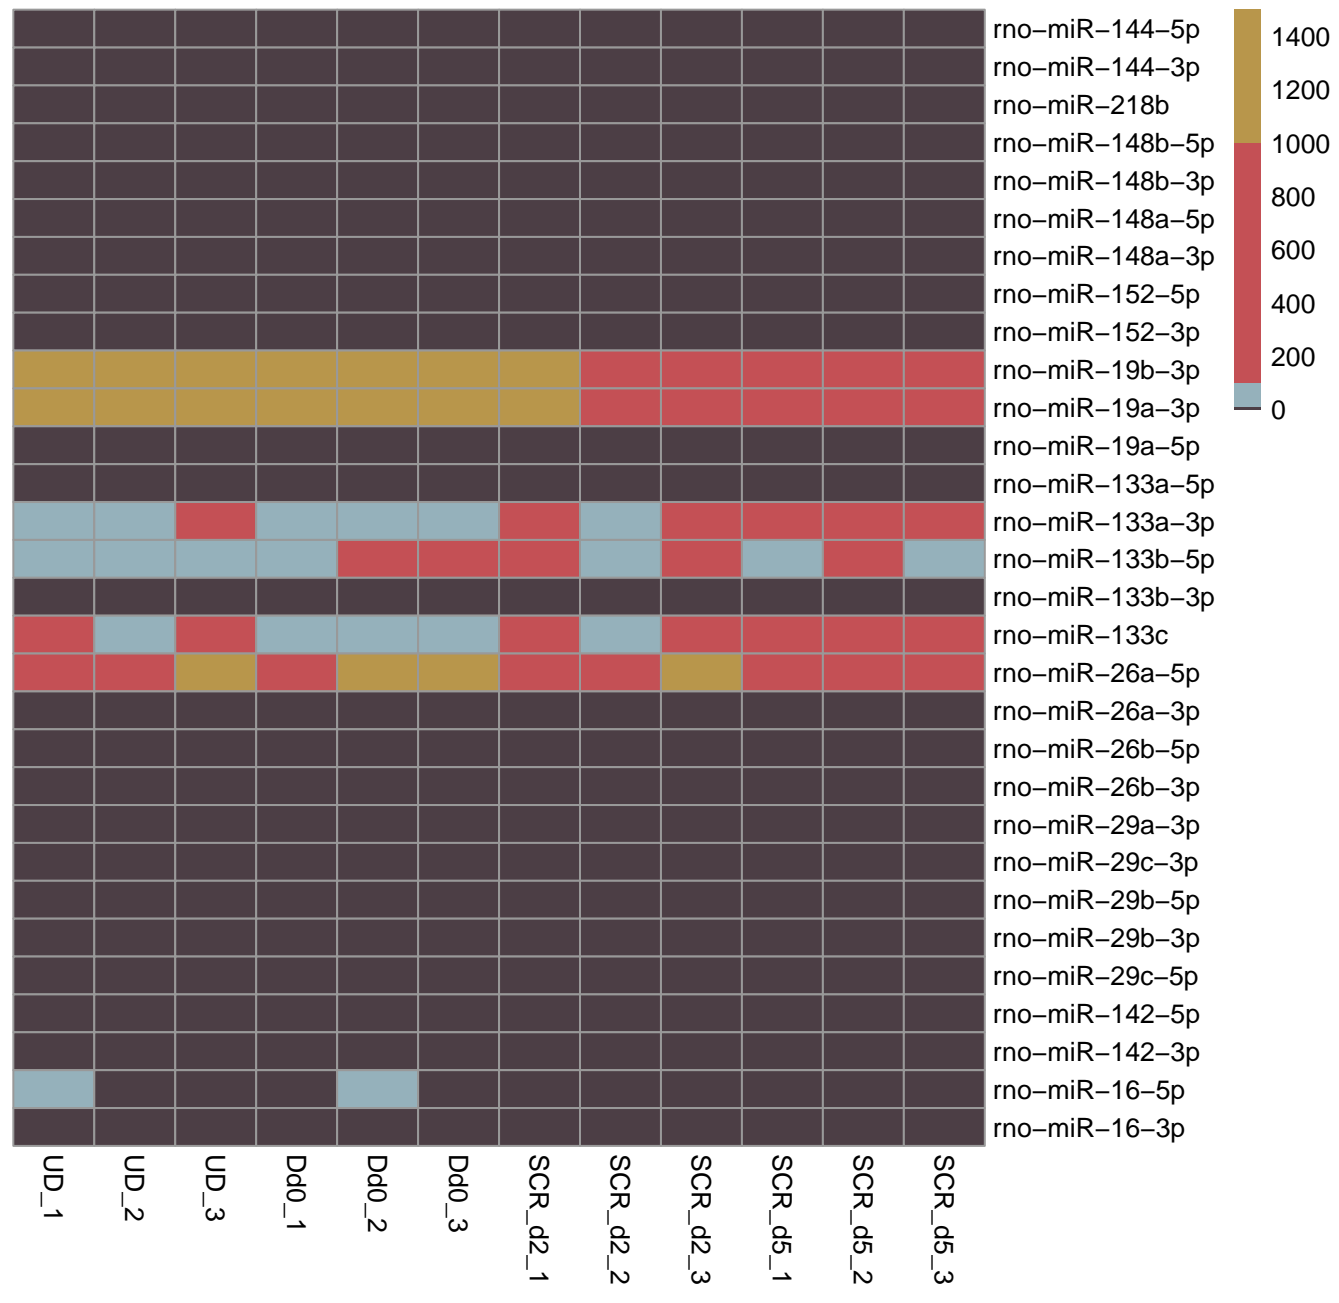

Supplement: s1 [file s1]

**miR-144**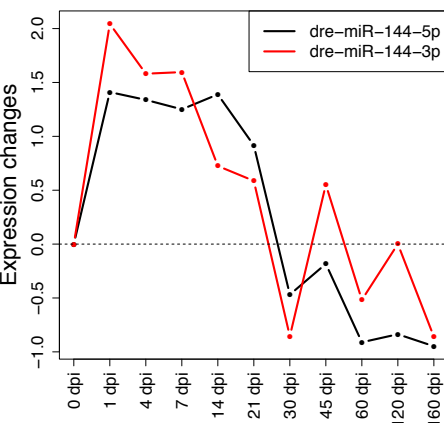**miR-26ab**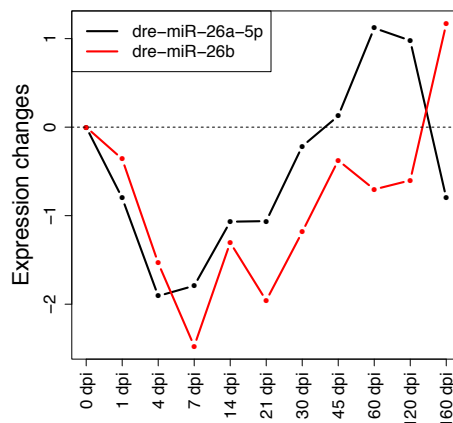**miR-218ab**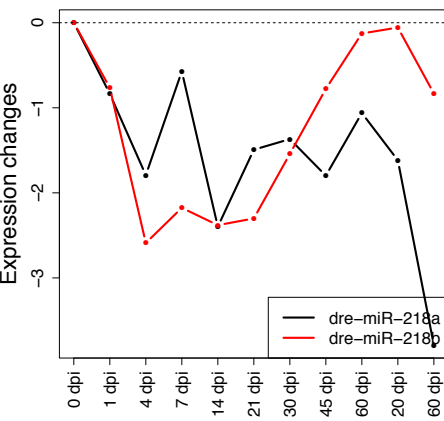**miR-29b**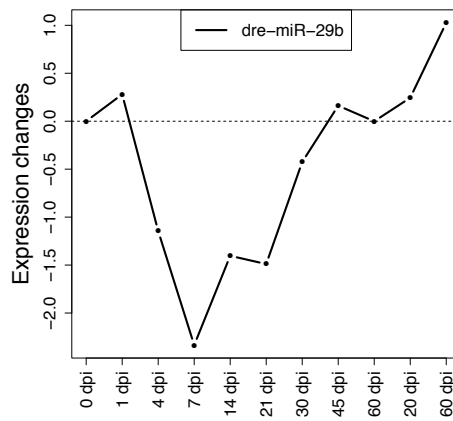**miR-148/miR-152**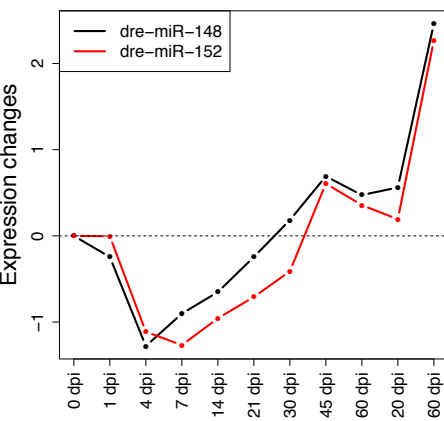**miR-101ab**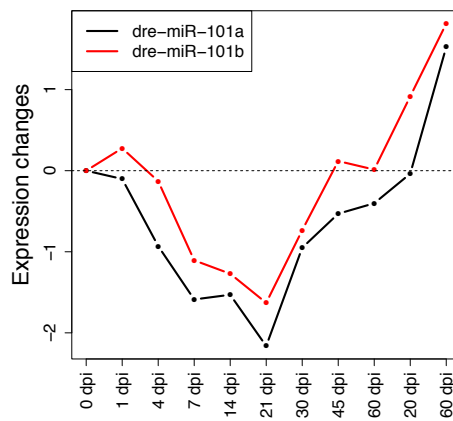**miR-19abcd**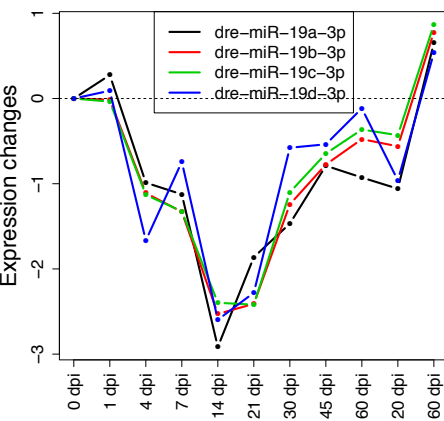**miR-142a**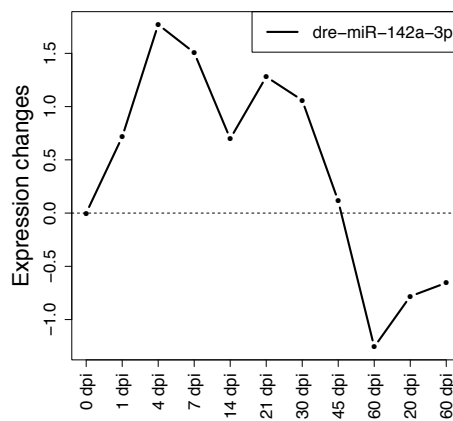**miR-133abc**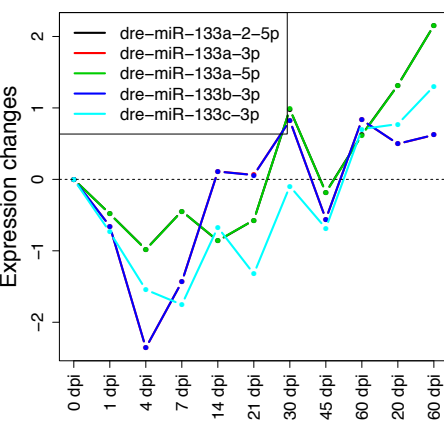**miR-16c**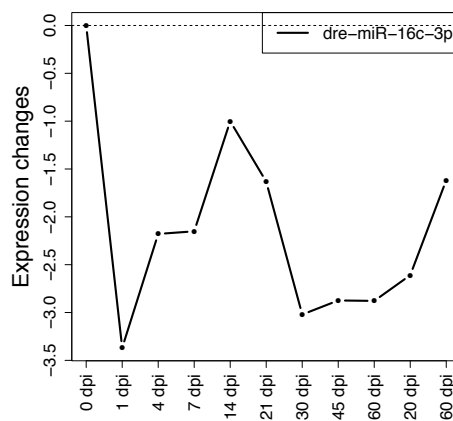

Supplement: s1 [file s1]

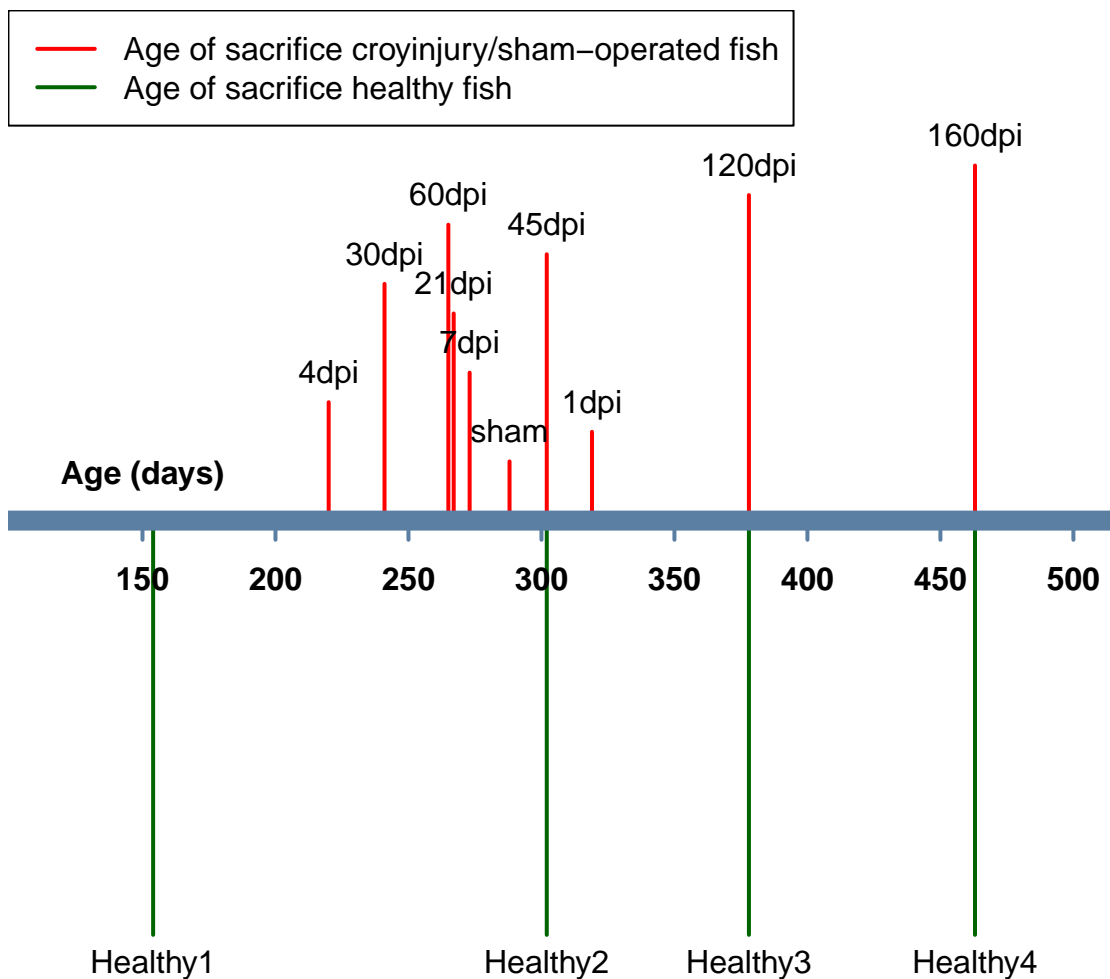

Supplement: s1 [file s1]
